# Supplementary material for: The Return of Wooded Landscapes in Wales: An Exploration of Possible Post-Brexit Futures.
Source: Preprints.org preprint supplement (doi:10.20944/preprints202011.0510.v1), 2020-11-19

**Table S1.** Reclassification of land use types used in the historical land use maps of Wales and in the current study. Columns 1 & 2 show the default legends of land use maps as used by Edina Digimap. Column 3 shows the harmonized/revised land use classes used in the presented modelling exercise.

| Land use Map 2015       | Land use Map 2007                   | Revised/Harmonized Land use Categories |
|-------------------------|-------------------------------------|----------------------------------------|
| Broadleaved woodland    | Broadleaved, mixed and yew woodland | Broadleaved woodland                   |
| Coniferous woodland     | Coniferous woodland                 | Coniferous woodland                    |
| Arable and horticulture | Arable and horticulture             | Arable and horticulture                |
| Improved grassland      | Improved grassland                  | Improved grassland                     |
| Neutral grassland       | Rough grassland                     | Semi-Natural grassland                 |
| Calcareous grassland    | Neutral grassland                   |                                        |
| Acid grassland          | Calcareous grassland                |                                        |
| Fen, Marsh and Swamp    | Acid grassland                      |                                        |
|                         | Fen, marsh and swamp                |                                        |
| Heather                 | Heather                             | Mountain, Heath, Bog                   |
| Heather grassland       | Heather grassland                   |                                        |
| Bog                     | Bog                                 |                                        |
| Inland rock             | Inland rock                         |                                        |
|                         | Montane habitats                    |                                        |
| Saltwater               | Saltwater                           | Water Bodies                           |
| Freshwater              | Freshwater                          |                                        |
| Supra-littoral rock     | Supra-littoral rock                 | Coastal                                |
| Supra-littoral sediment | Supra-littoral sediment             |                                        |
| Littoral rock           | Littoral rock                       |                                        |
| Littoral sediment       | Littoral sediment                   |                                        |
| Saltmarsh               | Saltmarsh                           |                                        |
| Urban                   | Urban                               | Built Areas                            |
| Suburban                | Sub-Urban                           |                                        |

**Figure S1.** Gain (green bars) and Loss (purple bars) in area (ha) under different LULC categories in Wales between 2015 and 2030 (5 scenarios).

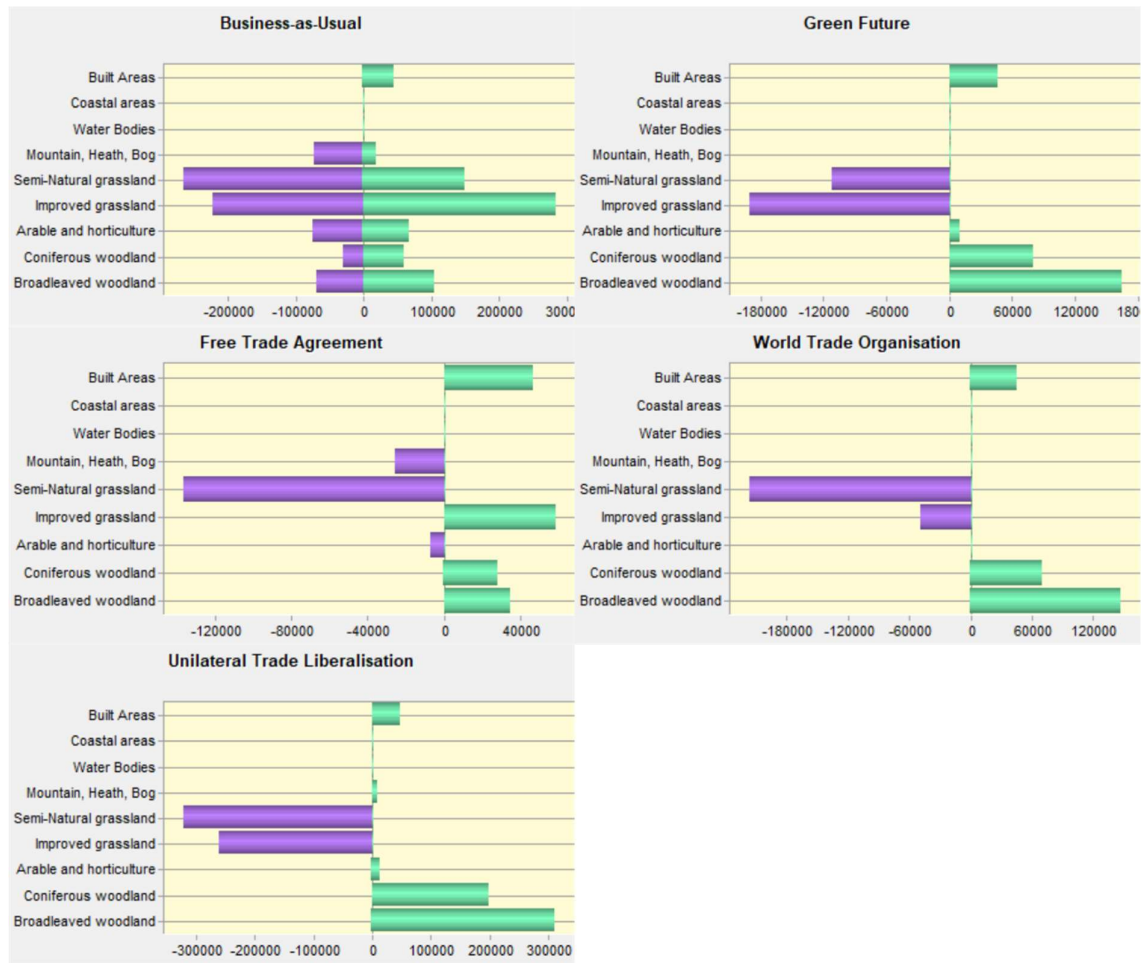

**Figure S2.** Land cover maps of Wales, a) 2007 and b) 2015.

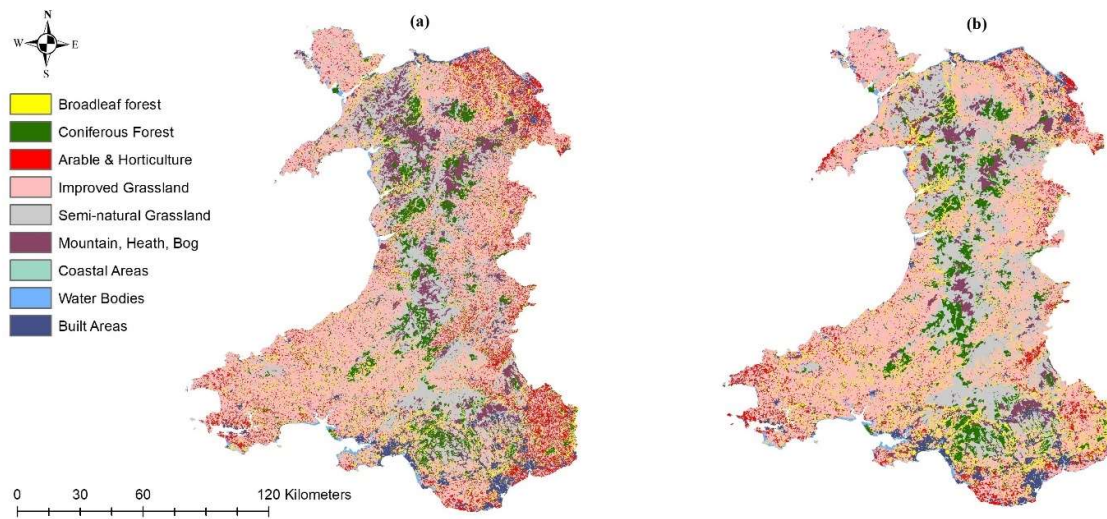

Supplement: Supplementary file 1 [file supplementary]
